# Supplementary material
Source: PubMed Central journal article supplement (PMC2634926)
Supplement: 0805133106_0805133106SI.pdf [file 0805133106_0805133106SI.pdf]

# Supporting Information

Pederson *et al.* 10.1073/pnas.0805133106

## SI Methods

**Western Blotting.** At the end of treatments, cells were placed on ice and rinsed 3 times with cold PBS. Laemmli sample buffer lacking bromophenol blue and 2-mercaptoethanol was added, and cell extracts were collected by scraping. Protein concentrations were determined by using the Bio-Rad Protein Quantitation In Detergent Analysis Kit. Forty micrograms of protein per lane was used for analysis. Before boiling and Western blotting, 2-mercaptoethanol and bromophenol blue were added to the samples. Western blotting was carried out as previously outlined (1). The following antibodies were used: SPHK1 (CalbioChem

catalog no. PC727); sclerostin (R & D System catalog no. AF1589); Wnt10b (R & D Systems catalog no. AF2110); and BMP6 (Santa Cruz Biotechnology catalog no. SC-27409). Antibodies were used at a 1:1,000 dilution for Western blotting as we have reported (1). Anti-tubulin hybridoma supernatant (E7) from the Developmental Studies Hybridoma Bank at the University of Iowa was also used at a 1:1,000 dilution. Peroxidase-conjugated secondary antibodies (Cell Signaling) were used at a 1:5,000 dilution with chemiluminescent detection using ECL Plus according to the product directions (GE Healthcare).

1. Gingery A, Bradley E, Shaw A, Oursler MJ (2003) Phosphatidylinositol 3-kinase coordinately activates the MEK/ERK and AKT/NFkappaB pathways to maintain osteoclast survival. *J Cell Biochem* 89:165–179.

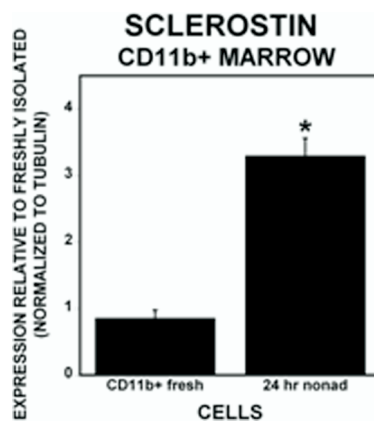

**Fig. S1.** CD11b<sup>+</sup> marrow cells were purified and either collected for RNA (fresh) or cultured overnight with M-CSF as above, and nonadherent cells were harvested (24 h nonad.). RNA was harvested for real-time PCR analyses ( $n = 3$  replicates). \*,  $P < 0.05$  compared with time 0. These results are representative of 2 experiments.

**Table S1. Affymetrix array results of secreted and extracellular matrix-associated osteoclast genes**


---

|                                                                                                    |
|----------------------------------------------------------------------------------------------------|
| a disintegrin and metalloprotease domains 2, 18, 21, 24, 25, 26, 28, 3, 33, 11                     |
| a disintegrin and metalloproteinase domains 12, 15, 19, 9                                          |
| a disintegrin-like and metalloprotease (reprolysin type) with thrombospondin type 1 motif, 1 and 8 |
| Activin A receptor, type 1B and type II-like 1                                                     |
| activin receptor IIB                                                                               |
| ADAM-like, decysin 1                                                                               |
| ADAMTS-like 1                                                                                      |
| adipocyte complement related protein                                                               |
| adipsin                                                                                            |
| allergen dl chain C2C                                                                              |
| amelogenin X chromosome                                                                            |
| androgen binding protein, alpha                                                                    |
| androgen-induced 1                                                                                 |
| aquaporin 1, 2,5                                                                                   |
| biglycan                                                                                           |
| BMP-binding endothelial regulator                                                                  |
| bone morphogenetic proteins 4, 5, 6, 7, 8b, 10, 15                                                 |
| bone morphogenic protein receptor, type II (serine/threonine kinase)                               |
| C1q and tumor necrosis factor related protein 1                                                    |
| cadherin 1, 15, 16, 17, 2, 20, 22,23, 3, 4, 5, 6, 8,                                               |
| cadherin EGF LAG seven-pass G-type receptor 1, 2, 3                                                |
| calcitonin receptor                                                                                |
| calcitonin receptor-like                                                                           |
| calcitonin/calcitonin-related polypeptide, alpha                                                   |
| calcitonin-related polypeptide, beta                                                               |
| cathepsin 6, 7, 8, B, C, E, F, G, H, J, K, L, M, R, S, W                                           |
| CDK5 regulatory subunit associated protein 1                                                       |
| chemokine (C motif) ligand 1                                                                       |
| chemokine (C-C motif) ligand 1, 12, 17, 19, 2, 20, 21a, 22, 24, 25, 27, 3, 4, 5, 6, 7, 8, 9,       |
| chemokine (C-C motif) ligand 5                                                                     |
| chemokine (C-X3-C motif) ligand 1                                                                  |
| chemokine (C-X-C motif) ligand 1, 10, 11, 12, 13, 14, 15, 2, 4, 5, 7, 9                            |
| colony stimulating factor 1 (macrophage)                                                           |
| colony stimulating factor 1 receptor                                                               |
| colony stimulating factor 2 (granulocyte-macrophage)                                               |
| colony stimulating factor 2 receptor, beta 2, low-affinity (granulocyte-macrophage)                |
| colony stimulating factor 3 (granulocyte)                                                          |
| colony stimulating factor 3 receptor (granulocyte)                                                 |
| connective tissue growth factor                                                                    |
| decidual/trophoblast prolactin-related protein                                                     |
| decorin                                                                                            |
| dickkopf homolog 1, 2, 3, 4                                                                        |
| Eph receptor A3                                                                                    |
| epidermal growth factor                                                                            |
| epidermal growth factor receptor                                                                   |
| fibroblast growth factor 10, 12, 15, 16, 17, 2, 20, 21, 22, 23, 3, 4, 5, 6, 7, 8,                  |
| fibroblast growth factor binding protein 1                                                         |
| fibroblast growth factor receptor 1, 2, 3, 4                                                       |
| fibroblast growth factor receptor-like 1                                                           |
| fibromodulin                                                                                       |
| fibronectin 1                                                                                      |
| forkhead box L1                                                                                    |
| frizzled homolog 5, 6, 7                                                                           |
| frizzled-related protein                                                                           |
| glucagon                                                                                           |
| glucagon receptor                                                                                  |
| glucagon-like peptide 1 receptor                                                                   |
| granzyme A, B, C, D, E, F, G, K, M                                                                 |
| growth arrest specific 6                                                                           |
| growth differentiation factor 10, 11, 15, 2, 3, 5, 9                                               |
| growth hormone                                                                                     |
| growth hormone receptor                                                                            |
| growth hormone releasing hormone                                                                   |
| Hedgehog-interacting protein                                                                       |
| Indian hedgehog                                                                                    |
| insulin I & II                                                                                     |
| insulin receptor-related receptor                                                                  |
| insulin-like 3, 5, 6                                                                               |
| insulin-like growth factor 1 & 2                                                                   |
| insulin-like growth factor binding protein 1, 2, 4, 5                                              |
| insulin-like growth factor binding protein, acid labile subunit                                    |
| integrin alpha 2, 2b, 7, 9, L                                                                      |
| integrin beta 1 (fibronectin receptor beta), 2, 2-like, 3, 5, 7,                                   |

---

---

integrin binding sialoprotein  
 integrin, alpha E, epithelial-associated  
 intercellular adhesion molecule 2  
 intercellular adhesion molecule 4, Landsteiner-Wiener blood group  
 intercellular adhesion molecule 5, telencephalin  
 interferon (alpha and beta) receptor 1 & 2  
 interferon alpha family, gene 1  
 interferon beta, fibroblast  
 interferon gamma  
 interferon gamma inducible protein 30  
 interferon gamma receptor  
 IL 1 alpha  
 IL 1 beta  
 IL 1 family, member 5, 6, 7, 8, 9  
 IL 1 receptor accessory protein-like 2  
 IL 1 receptor antagonist  
 IL 1 receptor, type I and II  
 IL 1 receptor-like 1  
 IL 1 receptor-like 1 ligand  
 IL 10 receptor, alpha  
 IL 10, 11, 12a, 12b, 13, 15, 17, 17B, 17E, 18, 2, 20, 21, 24, 25, 3, 4, 5, 6, 7, 9  
 IL 10-related T cell-derived inducible factor beta  
 IL 12 receptor, beta 1 and 2  
 IL 13 receptor, alpha 1 and 2  
 IL 15 receptor, alpha chain  
 IL 17 receptor & B  
 IL 18 binding protein  
 IL 18 receptor 1  
 IL 18 receptor accessory protein  
 IL 2 receptor, alpha and beta chains  
 IL 2 receptor, gamma chain  
 Interleukin 21 (IL21), mRNA  
 IL 21 receptor  
 IL 23, alpha subunit p19  
 IL 27 receptor, alpha  
 IL 3 receptor, alpha chain  
 IL 4 receptor, alpha  
 IL 5 receptor, alpha  
 IL 6 receptor, alpha  
 IL 6 signal transducer  
 killer cell lectin-like receptor, subfamily D, member 1  
 kit ligand  
 kit oncogene  
 klotho  
 latent transforming growth factor beta binding proteins 1 & 3  
 lectin, galactose binding, soluble 3  
 leptin  
 leptin receptor  
 leukemia inhibitory factor  
 leukemia inhibitory factor receptor  
 lumican  
 macrophage scavenger receptor 2  
 macrophage stimulating 1 (hepatocyte growth factor-like)  
 macrophage stimulating 1 receptor (c-met-related tyrosine kinase)  
 matrix metalloproteinase 10, 11, 12, 13, 14, 15, 16, 17, 19, 2, 20, 23, 24, 3, 7, 8, 9  
 mel transforming oncogene-like 1  
 meprin 1 alpha & beta  
 met proto-oncogene  
 midkine  
 nerve growth factor, beta  
 neural cell adhesion molecule 1  
 neural cell adhesion molecule 2  
 neural proliferation, differentiation and control gene 1  
 noggin  
 nuclear factor of kappa light chain gene enhancer in B-cells inhibitor, beta  
 oncostatin M receptor  
 oocyte secreted protein 1  
 osteoclast inhibitory lectin related protein  
 osteomodulin  
 parathyroid hormone  
 parathyroid hormone-like peptide  
 phospholipase A2, group X, XIII  
 platelet derived growth factor receptor, beta polypeptide  
 platelet derived growth factor, B polypeptide

---

---

platelet/endothelial cell adhesion molecule  
 platelet-derived growth factor, C polypeptide, D polypeptide  
 programmed cell death 1  
 programmed cell death 1 ligand 1  
 prolactin-like protein A  
 protocadherin beta 1, 10, 11, 12, 13, 15, 16, 17, 18, 19, 2, 21, 22, 3, 4, 6, 7, 8, 9  
 sclerostin  
 sclerostin domain containing 1  
 secreted acidic cysteine rich glycoprotein  
 secreted and transmembrane 1  
 secreted BMP-binding protein; Mus musculus twisted gastrulation protein (Tsg).  
 secreted frizzled-related sequence protein 1, 2, 5  
 secreted phosphoprotein 1  
 secreted protein SST3  
 secretin  
 sema domain, immunoglobulin domain (Ig), short basic domain, secreted, (semaphorin) 3A  
 sonic hedgehog  
 SPARC related modular calcium binding 1  
 stem cell growth factor  
 Sphingosine kinase 1, 2  
 stromal cell derived factor 1, 2, 2-like, 4  
 stromal cell derived factor receptor 1  
 stromal interaction molecule 1  
 superoxide dismutase 3, extracellular  
 thyroid stimulating hormone receptor  
 thyroid stimulating hormone, beta subunit  
 tissue inhibitor of metalloproteinase 1, 2  
 toll-like receptor 2, 3, 4, 5, 7, 8, 9  
 transforming growth factor alpha  
 transforming growth factor, beta 1, beta 3  
 transforming growth factor, beta induced  
 transforming growth factor, beta receptor III  
 triggering receptor expressed on myeloid cells 1, 3  
 tumor necrosis factor (ligand) superfamily, member 10, 6, 11a, 18, 19, 1a, 1b, 25, 4, 5, 7, 8, 9  
 tumor necrosis factor alpha induced protein 6  
 tumor necrosis factor receptor superfamily, member 11b (osteoprotegerin)  
 twisted gastrulation homolog 1 (Drosophila)  
 vascular cell adhesion molecule 1  
 vascular endothelial growth factor A, B, C  
 vitronectin  
 Wnt 10a, 10b, 2b, 1, 11, 16, 2, 3, 3A, 4, 5A, 6, 7A, 8A, 9A, 9B  
 Wnt inhibitory factor 1  
 WNT1 inducible signaling pathway protein 1, 2

---

Microarray analysis and validation. Total RNA was isolated from 3 independent osteoclast cultures followed by reverse transcription. Purified double-stranded cDNA was in vitro transcribed in the presence of biotinylated dUTP and dCTP, and fragmented cRNA was hybridized to the Mouse Expression Array 430A (Affymetrix), followed by staining with streptavidin-phycoerythrin. Arrays were scanned and analyzed with GeneChip3.1 software. To eliminate nonexpressed and highly variable genes, the gene's expression level had to be scored "Present" by the GeneChip software algorithm in all 3 samples. Two selection criteria were used to generate the candidate gene list: (i) extracellular matrix-associated genes and (ii) secreted protein genes. The list was further narrowed by a survey of the relevant literature to generate the list of genes that were examined for real-time PCR analysis of expression changes comparing marrow-derived preosteoclasts (day 0 or day 3 of culture) to mature osteoclasts (Table S2, left data column). Genes whose expression was significantly altered during differentiation ( $P < 0.05$ ) were further examined for expression changes during differentiation of RAW 264.7 cells into osteoclasts by real-time PCR (Table S2, right data column). The final selection of the candidates pursued involved demonstrating concordant changes by real-time PCR in both the marrow-derived and RAW 264.7 osteoclasts. Candidate coupling factors selected for study are indicated in bold. ND, not done.

**Table S2. Marrow cells were harvested and cultured as described in *Methods***

| Gene                           | Osteoclast source |                |
|--------------------------------|-------------------|----------------|
|                                | Marrow-derived    | RAW-derived    |
| BMP2                           | 76.6 ± 24.7*      | 0.8 ± 0.04     |
| BMP4                           | 3.7 ± 0.2*        | 0.6 ± 0.5      |
| BMP6                           | 3.7 ± 0.6*        | 54.6 ± 11.3*   |
| BMP7                           | 3.2 ± 1.7*        | 0.5 ± 1.2      |
| Cardiotrophin-1                | 1.7 ± 0.6         | ND             |
| CTGF                           | 469.7 ± 367.9*    | No signal      |
| DKK1                           | 10.2 ± 0.1*       | 1.1 ± 0.8      |
| DKK2                           | 50.2 ± 20.4*      | 0.15 ± 0.1*    |
| DKK3                           | 53.6 ± 23.1*      | 1.8 ± 0.3      |
| EphrinB2                       | 4.7 ± 0.2*        | 2.3 ± 0.3*     |
| Growth hormone                 | 0.98 ± 0.2        | ND             |
| IGF-I                          | 1.2 ± 0.5         | ND             |
| IGF-II                         | 1.1 ± 0.2         | ND             |
| Klotho                         | 6.2 ± 1.3*        | 1.1 ± 0.2      |
| Osteopontin                    | 0.9 ± 0.4         | ND             |
| Sclerostin                     | 0.06 ± 0.16*      | 0.001 ± 0.003* |
| Sclerostin domain-containing 1 | 0.4 ± 0.2*        | ND             |
| Semaphorin 7a                  | 216.2 ± 88.9*     | 2.9 ± 1.9*     |
| SPHK1                          | 3.2 ± 0.2*        | 4.1 ± 0.2*     |
| SPHK2                          | 2.9 ± 0.3*        | 1.7 ± 0.9*     |
| Wnt3a                          | 2.0 ± 0.1*        | 1.7 ± 0.4      |
| Wnt10b                         | 3.8 ± 0.2*        | 49.2 ± 12.3*   |

Cells were harvested prior to fusion (precursor) or once fused (osteoclast). RAW 264.7 cells were cultured without RANKL (precursor) or after culture for 5 days with RANKL (osteoclasts). RNA was harvested and analyzed by real-time PCR as detailed in *Methods*. Values are normalized to tubulin. Below are the ratios of mature osteoclast to precursor expression levels. \*,  $P < 0.05$  comparing undifferentiated to differentiated osteoclasts. In bold are the selected candidate factors further examined in these studies. ND, not done.

**Table S3. Genes and primers**

| Gene                           | Left primer                  | Right primer                 |
|--------------------------------|------------------------------|------------------------------|
| BMP2                           | 5'-CTGCAGCAAGAACAAAGCAG-3'   | 5'-CCCTGGAAGGGATTATAGGC-3'   |
| BMP4                           | 5'-GGGCTTCCACCGTATAAACA-3'   | 5'-TGTGATGAGGTGTCCAGGAA-3'   |
| BMP6                           | 5'-GGTTCTTCAGACTACAACGG-3'   | 5'-GAAGGAACACTCTCCATCA-3'    |
| BMP7                           | 5'-CTATGCTGCCTACTACTGTG-3'   | 5'-TGATGAAGTGAACCAGTGTG-3'   |
| Cardiotrophin-1                | 5'-CCACCAGACTGACTCCTCAAT-3'  | 5'-CTCCCTGTTGCTGCACGTA-3'    |
| CTGF                           | 5'-TGCTGTGCAGGTGATAAAGC-3'   | 5'-AAGGCCATTTGTTCAACAAC-3'   |
| DKK1                           | 5'-CCATTCTGGCCAACCTCTTC-3'   | 5'-GAATCACTTGCTTGGGCATT-3'   |
| DKK2                           | 5'-CAATAATGGAATCTGCATCCC-3'  | 5'-CTTCCTAGATTCTGCCATCC-3'   |
| DKK3                           | 5'-CACAAGATAACCAACAACCG-3'   | 5'-TGATACATCATGGCTCCTC-3'    |
| EphrinB2                       | 5'-GTCATCGGTTGGCTACGTTT-3'   | 5'-CCCCACTCCCCTGAACTACT-3'   |
| Growth hormone                 | 5'-CTGCTGACACCTACAAAGAG-3'   | 5'-AATTCATGTGCGTTCTCTG-3'    |
| IGF-I                          | 5'-CCCCACTGAAGCCTACAAAA-3'   | 5'-CACCCACTCGATCGTACCTT-3'   |
| IGF-II                         | 5'-TGTGGTAATTCTGCAAGGTG-3'   | 5'-GTATACAGTTCTCCTGGCTC-3'   |
| Klotho                         | 5'-GTCCAGAGCAGCCCATTAAG-3'   | 5'-GGGCACACCTCAAAAACATT-3'   |
| Osteopontin                    | 5'-CGATGATGATGACGATGGAG-3'   | 5'-CAGACTCATCCGAATGGTGA-3'   |
| Sclerostin                     | 5'-CGGTGTGTCAACGACAAGAC-3'   | 5'-CGGGTGTACCTCTTGCACTT-3'   |
| Sclerostin domain containing 1 | 5'-CGGTGTGTCAACGACAAGAC-3'   | 5'-CGGGTGTACCTCTTGCACTT-3'   |
| Semaphorin 7a                  | 5'-TGGAACCTGGTGAATGACAG-3'   | 5'-GGTAGAGTACATTCATCTCC-3'   |
| SPHK1                          | 5'-GACTTTGTCCTGGTGTGGT-3'    | 5'-CCGCACGTACGTAGAACAGA-3'   |
| SPHK2                          | 5'-CTGACCCCTCAGTTCCAGAG-3'   | 5'-GAAACCTTGGCTGGTCAATA-3'   |
| Wnt3a                          | 5'-GGCATGGAGAAGAACTCAGG-3'   | 5'-CTTGGAAGAAGGGGTGCAGAG-3'  |
| Wnt10b                         | 5'-CCACTGGTGCTGTTATGTGC-3'   | 5'-CAGTGCTTCTCCTCCTCGTC-3'   |
| TUBULIN                        | 5'-CTGCTCATCAGCAAGATCAGAG-3' | 5'-GCATTATAGGGCTCCACCACAG-3' |
